# Supplementary material for: Testing the Effect of Relative Pollen Productivity on the REVEALS Model: A Validated Reconstruction of Europe-Wide Holocene Vegetation
Source: MDPI journal article supplement (doi:10.3390/land12050986), 2023-04-29
Supplement: s1 [file land-2338798-supplementary.pdf › land-2338798-supplementary.pdf]

## Glossary/ abbreviations :

1. RPPs : Relative pollen productivities
2. RPPs means : indicating the whole list of means values of relative pollen productivity of each taxa calculated between different values in Europe
3. RPP-means datasets:
4. RPPs.sts: defines the datasets used in the paper
5. RPPs.st1: defines dataset 1
6. RPPs.st2: defines dataset 2
7. RPPs.st3: defines dataset 3
8. FSP: Fall Speed of Pollen
9. RV-Trees: Tree Reveals estimates (evergreen and summergreen trees) of top core samples in pollen records used only for validation
10. GFC-Trees: mean percentage of actual cover of trees extracted from Global Forest Change dataset (Hansen et al., 2013) used for validation
11. RW-data: raw pollen data
12. RV-Trees.st(1): REVEALS estimates for tree cover RPPs.st(1)
13. RV-Trees.LnB.st(1): REVEALS estimates for tree cover RPPs.st(1) using lakes and bogs
14. RV-Trees.L.st(1): REVEALS estimates for tree cover RPPs.st(1) using only lakes
15. RV-Trees.L.sts: REVEALS estimates for tree cover RPPs.sts using only lakes
16. RV-Trees.LnB.sts: REVEALS estimates for tree cover RPPs.sts using lakes and bogs
17. TWs: Time windows
18. GbRV: grid based REVEALS
19. Gb-RVest: grid based REVEALS estimates
20. Gb-RVest.st1: grid based REVEALS estimates for RPPs.st1
21. Gb-RVest.st2: grid based REVEALS estimates for RPPs.st2
22. Gb-RVest.st3: grid based REVEALS estimates for RPPs.st3
23. RVest: REVEALS estimates
24. LCTs: Land Cover Types
25. Gb-RVest-LCTs: grid based REVEALS estimates for Land Cover Types
26. Gb-RVest-LCTs.sts: grid based REVEALS estimates for Land Cover Types in RPPs.sts
27. Gb-RVest-LCTs.st1: grid based REVEALS estimates for Land Cover Types for RPPs.st1
28. Gb-RVest-LCTs.st2: grid based REVEALS estimates for Land Cover Types for RPPs.st2
29. Gb-RVest-LCTs.st3: grid based REVEALS estimates for Land Cover Types for RPPs.st3
30. Gb-RVest-(ET).st(1): grid based REVEALS estimates (RPPs.st1) for (ET)
31. GPM: Gaussian Plume model
32. MA: major axis regression
33. (ET)-RV-line.st(2): REVEALS estimates regression line for Evergreen trees in RPPs.st2
34. (ET)-RV.st(1): REVEALS estimates for evergreen trees in RPPs.st1
35. SE: Standard Error
